# Supplementary material for: Capsaicin, a Powerful •OH-Inactivating Ligand
Source: PubMed Central journal article supplement (PMC7763808; doi:10.3390/antiox9121247), 2020-12-08
Supplement: antioxidants-09-01247-s001.pdf [file antioxidants-09-01247-s001.pdf]

# Capsaicin, a Powerful OH-Inactivating Ligand

Adriana Pérez-González,<sup>1</sup> Mario Prejano,<sup>2</sup> Nino Russo,<sup>2</sup> Tiziana Marino,<sup>2\*</sup> Annia Galano<sup>3\*</sup>

<sup>1</sup> CONACYT - Universidad Autónoma Metropolitana - Iztapalapa. San Rafael Atlixco 186, Col. Vicentina. Iztapalapa. C. P. 09340. México D. F. México.

<sup>2</sup> Department of Chemistry and Chemical Technologies of Università della Calabria (UNICAL). Calabria, I-87036, Rende, ITALY.

<sup>3</sup> Departamento de Química. Universidad Autónoma Metropolitana-Iztapalapa. San Rafael Atlixco 186, Col. Vicentina. Iztapalapa. C. P. 09340. México D. F. México.

## Table of Contents

|                                                                                                                                                                                                                                                                                                                                                                                                                                                                                                                                                                                 |    |
|---------------------------------------------------------------------------------------------------------------------------------------------------------------------------------------------------------------------------------------------------------------------------------------------------------------------------------------------------------------------------------------------------------------------------------------------------------------------------------------------------------------------------------------------------------------------------------|----|
| <b>Figure S1.</b> RMSD trends calculated along molecular dynamics of neutral and anion forms of capsaicin molecule in water (top) and gas phase (bottom). On the right, the representative clusters extrapolated from the simulations. In blue, is represented the most populated clustered geometry.....                                                                                                                                                                                                                                                                       | 2  |
| <b>Figure S2.</b> Number of hydrogen bonds in the MD simulation of the neutral and anion form of the capsaicin.....                                                                                                                                                                                                                                                                                                                                                                                                                                                             | 3  |
| <b>Figure S3.</b> Molar fractions of Capsaicin (CAP).....                                                                                                                                                                                                                                                                                                                                                                                                                                                                                                                       | 4  |
| <b>Table S1.</b> Parameters adopted during MD simulations in AMBER package format .....                                                                                                                                                                                                                                                                                                                                                                                                                                                                                         | 5  |
| <b>Table S2.</b> Molar fraction of Capsaicin (8-methyl-N-vanillyl-6-nonenamide, CAP, pKa=10.1) at different pH.....                                                                                                                                                                                                                                                                                                                                                                                                                                                             | 11 |
| <b>Table S3.</b> Acronyms and structures of the modeled complexes. The chelation routes (CR) in which of them is involved is specified, as well as the chelation sites (CS)_conformation (C) and structure.....                                                                                                                                                                                                                                                                                                                                                                 | 12 |
| <b>Table S4.</b> Gibbs free energies of reaction ( $\Delta G^\circ$ , kcal/mol), reorganization energies ( $\lambda$ , kcal/mol), Gibbs free energies of activation ( $\Delta G^\ddagger$ , kcal/mol), rate coefficients ( $k_i^{app}$ , $M^{-1}s^{-1}$ ) and overall rate coefficients ( $k_{overall}$ , $M^{-1}s^{-1}$ ) for the reduction of the free Cu(II) by reductants. The values corresponding to reduction by $O_2^-$ and the ascorbate anion ( $Asc^-$ ) are included for comparison purposes. The data correspond to aqueous solution, at pH=7.4, and 298.15 K..... | 16 |

---

\* E-mail: [tiziana.marino65@unical.it](mailto:tiziana.marino65@unical.it)

\* E-mail: [agal@xanum.uam.mx](mailto:agal@xanum.uam.mx)

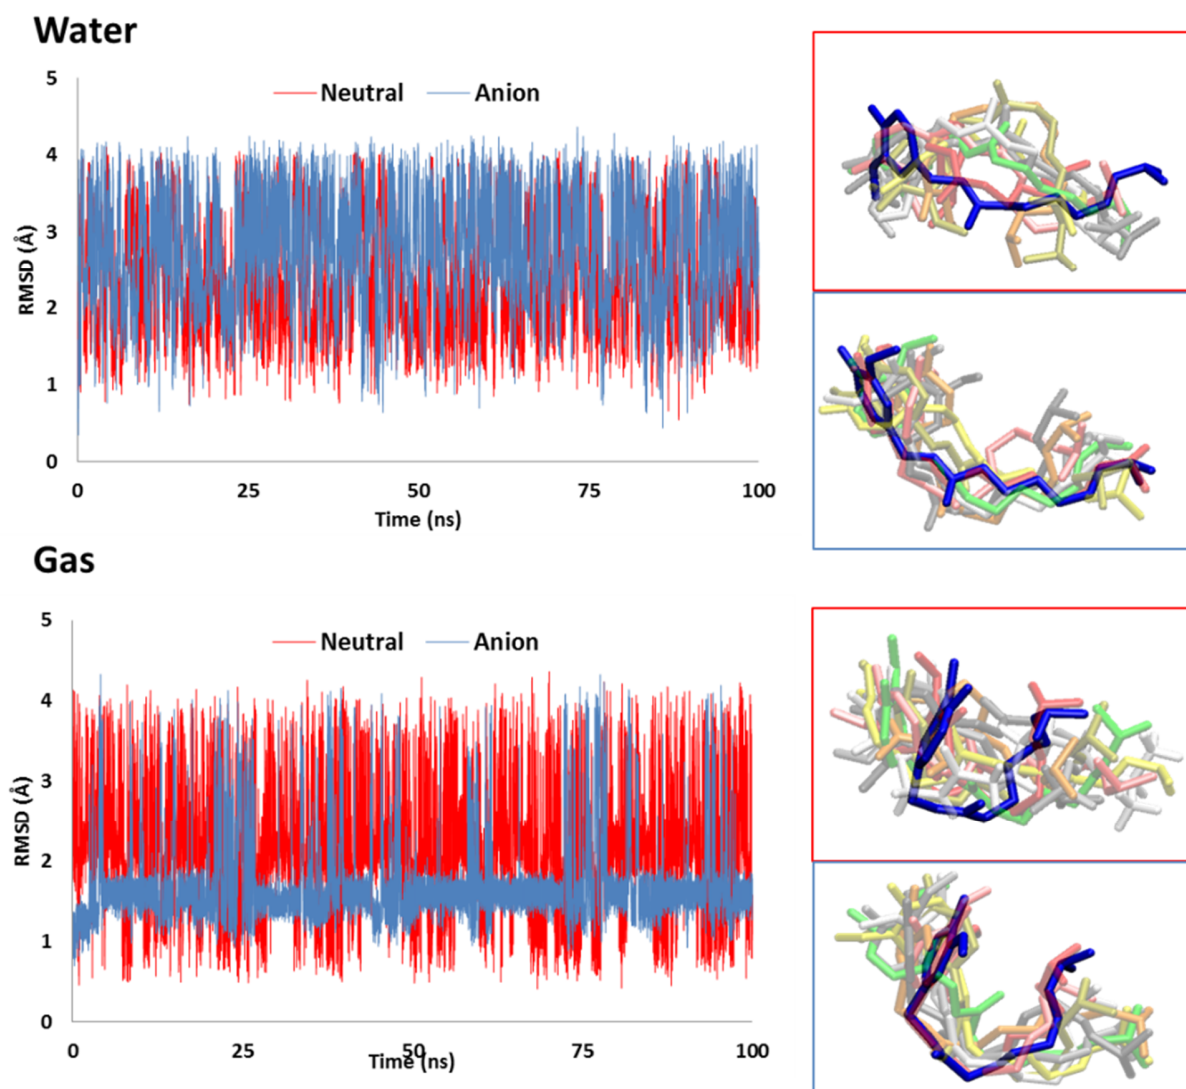

**Figure S1.** RMSD trends calculated along molecular dynamics of neutral and anion forms of capsaicin molecule in water (top) and gas phase (bottom). On the right, the representative clusters extrapolated from the simulations. In blue, is represented the most populated clustered geometry.

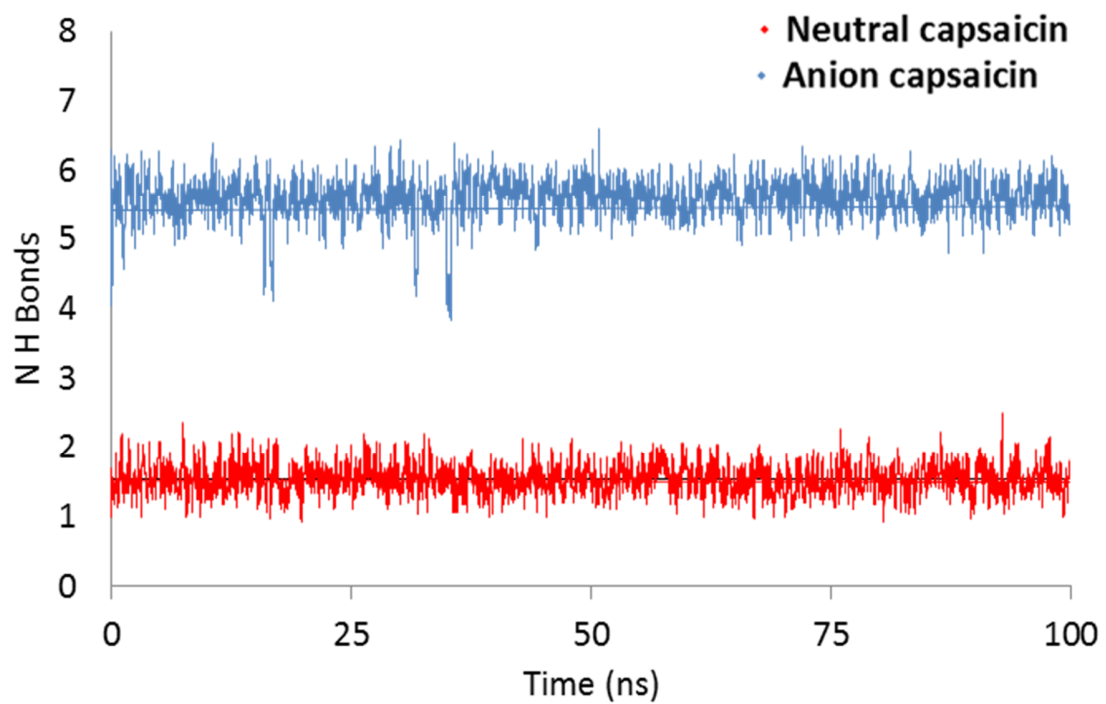

**Figure S2.** Number of hydrogen bonds in the MD simulation of the neutral and anion form of the capsaicin.

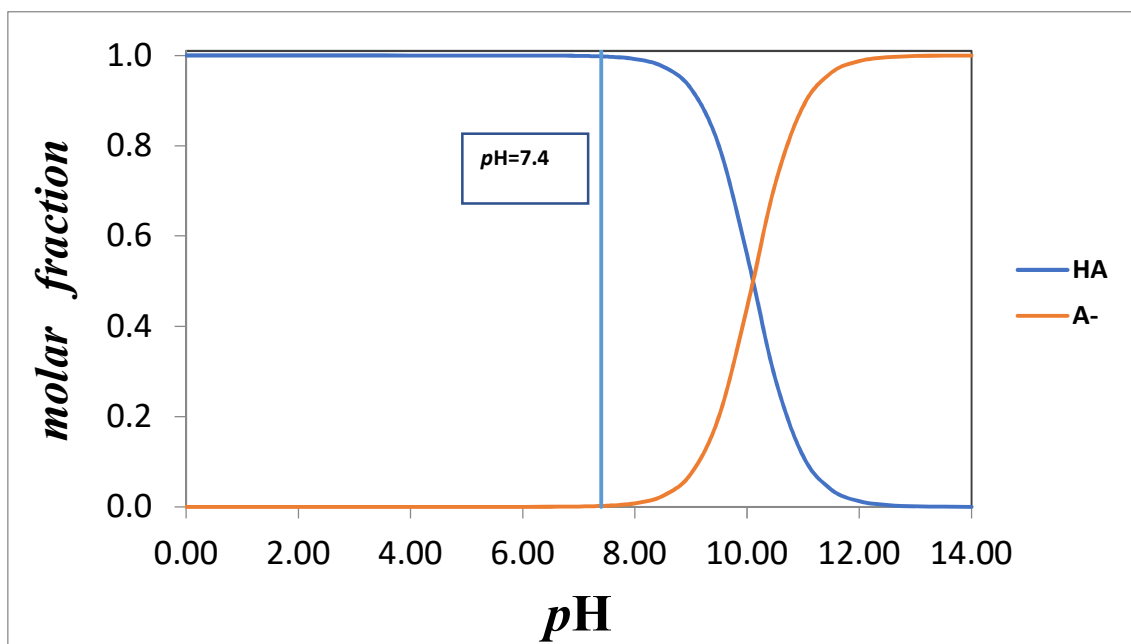

Figure S3. Molar fractions of Capsaicin (CAP).

**Table S1.** Parameters adopted during MD simulations in AMBER package format  
Caps\_n.prepc

0 0 2

This is a remark line  
molecule.res  
MOL XYZ 0  
CHANGE OMIT DU BEG  
0.0000

1 DUMM DU M 999.000 999.0 -999.0  
.00000  
2 DUMM DU M 999.000 -999.0 999.0  
.00000  
3 DUMM DU M -999.000 999.0 999.0  
.00000  
4 N1 n M -3.428000 0.711000 -  
0.554000 -0.617765  
5 C7 c B -3.147000 1.509000 0.504000  
0.661352  
6 O1 o E -3.134000 1.102000 1.637000  
-0.602586  
7 C4 c3 3 -2.861000 2.963000 0.169000  
-0.158299  
8 C2 c3 3 -1.552000 3.177000 -0.609000  
-0.015708  
9 C1 c3 3 -0.310000 2.641000 0.106000  
0.139548  
10 C3 c3 3 0.983000 2.927000 -  
0.668000 -0.046821  
11 C6 c2 B 2.204000 2.370000 0.015000  
-0.187780  
12 C8 c2 B 3.009000 1.458000 -  
0.497000 -0.329843  
13 C5 c3 3 4.230000 0.883000 0.178000  
0.394787  
14 C11 c3 3 5.502000 1.243000 -  
0.601000 -0.399037  
15 H15 hc E 6.385000 0.840000 -  
0.113000 0.094370  
16 H16 hc E 5.621000 2.319000 -  
0.679000 0.094370

17 H17 hc E 5.468000 0.838000 -  
1.609000 0.094370  
18 C12 c3 3 4.099000 -0.638000  
0.333000 -0.399037  
19 H18 hc E 4.019000 -1.122000 -  
0.637000 0.094370  
20 H19 hc E 4.967000 -1.052000  
0.838000 0.094370  
21 H20 hc E 3.215000 -0.899000  
0.905000 0.094370  
22 H9 hc E 4.307000 1.321000 1.171000  
-0.015908  
23 H11 ha E 2.802000 1.072000 -  
1.486000 0.170748  
24 H10 ha E 2.408000 2.756000  
1.003000 0.121201  
25 H5 hc E 0.907000 2.511000 -  
1.669000 0.036228  
26 H6 hc E 1.094000 4.004000 -  
0.786000 0.036228  
27 H1 hc E -0.247000 3.083000  
1.099000 -0.004038  
28 H2 hc E -0.401000 1.569000  
0.252000 -0.004038  
29 H3 hc E -1.623000 2.721000 -  
1.594000 -0.005116  
30 H4 hc E -1.439000 4.244000 -  
0.783000 -0.005116  
31 H7 hc E -3.693000 3.364000 -  
0.404000 0.054568  
32 H8 hc E -2.825000 3.492000  
1.113000 0.054568  
33 H14 hn E -3.282000 1.077000 -  
1.467000 0.370229  
34 C9 c3 M -3.585000 -0.730000 -  
0.433000 -0.035844  
35 H12 h1 E -4.263000 -1.052000 -  
1.214000 0.108534  
36 H13 h1 E -4.067000 -0.918000  
0.515000 0.108534  
37 C10 ca M -2.285000 -1.502000 -  
0.533000 0.043761  
38 C14 ca B -1.914000 -2.137000 -  
1.699000 -0.246508  
39 C16 ca S -0.701000 -2.817000 -  
1.788000 -0.272672  
40 H23 ha E -0.407000 -3.314000 -  
2.694000 0.197403  
41 H22 ha E -2.565000 -2.116000 -  
2.556000 0.173108  
42 C13 ca M -1.426000 -1.559000  
0.571000 -0.340153

|                    |           |           |           |       |
|--------------------|-----------|-----------|-----------|-------|
| 43 H21 ha E        | -1.716000 | -1.064000 | ca 12.010 | 0.360 |
| 1.477000 0.218164  |           |           | os 16.000 | 0.465 |
| 44 C15 ca M        | -0.227000 | -2.228000 | oh 16.000 | 0.465 |
| 0.486000 0.231506  |           |           | ho 1.008  | 0.135 |
| 45 O2 os S         | 0.681000  | -2.349000 |           |       |
| 1.488000 -0.321975 |           |           |           |       |
| 46 C18 c3 3        | 0.421000  | -1.748000 |           |       |
| 2.729000 0.044316  |           |           |           |       |
| 47 H25 h1 E        | 1.272000  | -1.970000 |           |       |
| 3.356000 0.058439  |           |           |           |       |
| 48 H26 h1 E        | -0.475000 | -2.158000 |           |       |
| 3.180000 0.058439  |           |           |           |       |
| 49 H27 h1 E        | 0.317000  | -0.674000 |           |       |
| 2.629000 0.058439  |           |           |           |       |
| 50 C17 ca M        | 0.143000  | -2.862000 |           |       |
| 0.706000 0.276596  |           |           |           |       |
| 51 O3 oh S         | 1.320000  | -3.516000 |           |       |
| 0.794000 -0.583982 |           |           |           |       |
| 52 H24 ho E        | 1.771000  | -3.451000 |           |       |
| 0.039000 0.409308  |           |           |           |       |
|                    |           |           |           |       |
| LOOP               |           |           |           |       |
| C17 C16            |           |           |           |       |

#### BOND

|       |        |       |
|-------|--------|-------|
| n-c   | 427.60 | 1.379 |
| n-hn  | 403.20 | 1.013 |
| n-c3  | 328.70 | 1.462 |
| c-o   | 637.70 | 1.218 |
| c-c3  | 313.00 | 1.524 |
| c3-c3 | 300.90 | 1.538 |
| c3-hc | 330.60 | 1.097 |
| c3-c2 | 326.80 | 1.510 |
| c2-c2 | 569.40 | 1.334 |
| c2-ha | 343.10 | 1.088 |
| c3-h1 | 330.60 | 1.097 |
| c3-ca | 321.00 | 1.516 |
| ca-ca | 461.10 | 1.398 |
| ca-ha | 345.80 | 1.086 |
| ca-os | 376.60 | 1.370 |
| os-c3 | 308.60 | 1.432 |
| ca-oh | 384.00 | 1.364 |
| oh-ho | 371.40 | 0.973 |

#### IMPROPER

|                 |
|-----------------|
| C9 C7 N1 H14    |
| C4 N1 C7 O1     |
| C8 C3 C6 H10    |
| C6 C5 C8 H11    |
| C9 C14 C10 C13  |
| C10 C16 C14 H22 |
| C14 C17 C16 H23 |
| C10 C15 C13 H21 |
| C13 C17 C15 O2  |
| C16 C15 C17 O3  |

#### DONE

STOP

Caps\_n.frcmod

remark goes here

#### MASS

|    |        |       |
|----|--------|-------|
| n  | 14.010 | 0.530 |
| c  | 12.010 | 0.616 |
| o  | 16.000 | 0.434 |
| c3 | 12.010 | 0.878 |
| c2 | 12.010 | 0.360 |
| hc | 1.008  | 0.135 |
| ha | 1.008  | 0.135 |
| hn | 1.008  | 0.161 |
| h1 | 1.008  | 0.135 |

#### ANGLE

|          |        |         |
|----------|--------|---------|
| n-c-o    | 74.220 | 123.050 |
| n-c-c3   | 66.790 | 115.180 |
| n-c3-h1  | 49.840 | 108.880 |
| n-c3-ca  | 66.210 | 112.380 |
| c-n-hn   | 48.330 | 117.550 |
| c-n-c3   | 63.390 | 120.690 |
| c-c3-c3  | 63.270 | 111.040 |
| c-c3-hc  | 46.930 | 108.770 |
| o-c-c3   | 67.400 | 123.200 |
| c3-c3-c3 | 62.860 | 111.510 |
| c3-c3-hc | 46.340 | 109.800 |
| c3-c3-c2 | 63.410 | 111.560 |
| c3-c2-c2 | 64.060 | 123.630 |
| c3-c2-ha | 45.940 | 115.680 |
| c2-c3-hc | 46.990 | 110.360 |
| c2-c2-ha | 49.850 | 120.430 |
| hc-c3-hc | 39.400 | 107.580 |
| hn-n-c3  | 45.800 | 117.680 |
| c3-ca-ca | 63.530 | 120.770 |
| h1-c3-h1 | 39.240 | 108.460 |
| h1-c3-ca | 46.990 | 109.560 |
| ca-ca-ca | 66.620 | 120.020 |
| ca-ca-ha | 48.180 | 119.880 |
| ca-ca-oh | 69.520 | 119.900 |
| ca-ca-os | 69.580 | 119.200 |
| ca-os-c3 | 62.520 | 117.960 |
| os-c3-h1 | 50.800 | 109.780 |

ca-oh-ho 49.000 108.580

os-ca-ca-oh 1 3.625 180.000 2.000

DIHE

n-c-c3-c3 1 0.100 0.000 -4.000  
n-c-c3-c3 1 0.070 0.000 2.000  
n-c-c3-hc 1 0.000 180.000 2.000  
n-c3-ca-ca 1 0.000 0.000 2.000  
c-n-c3-h1 1 0.000 0.000 2.000  
c-n-c3-ca 1 0.000 0.000 2.000  
c-c3-c3-c3 1 0.156 0.000 3.000  
c-c3-c3-hc 1 0.156 0.000 3.000  
o-c-n-hn 1 2.500 180.000 -2.000  
o-c-n-hn 1 2.000 0.000 1.000  
o-c-n-c3 1 2.500 180.000 2.000  
o-c-c3-c3 1 0.000 180.000 2.000  
o-c-c3-hc 1 0.800 0.000 -1.000  
o-c-c3-hc 1 0.000 0.000 -2.000  
o-c-c3-hc 1 0.080 180.000 3.000  
c3-c-n-hn 1 2.500 180.000 2.000  
c3-c-n-c3 1 0.000 0.000 -2.000  
c3-c-n-c3 1 1.500 180.000 1.000  
c3-c3-c3-c3 1 0.180 0.000 -3.000  
c3-c3-c3-c3 1 0.250 180.000 -2.000  
c3-c3-c3-c3 1 0.200 180.000 1.000  
c3-c3-c3-hc 1 0.160 0.000 3.000  
c3-c3-c3-c2 1 0.156 0.000 3.000  
c3-c3-c2-c2 1 0.000 0.000 2.000  
c3-c3-c2-ha 1 0.000 0.000 2.000  
c3-c2-c2-c3 1 6.650 180.000 -2.000  
c3-c2-c2-c3 1 1.900 180.000 1.000  
c3-c2-c2-ha 1 6.650 180.000 2.000  
c2-c3-c3-hc 1 0.156 0.000 3.000  
c2-c2-c3-hc 1 0.380 180.000 -3.000  
c2-c2-c3-hc 1 0.000 0.000 -2.000  
c2-c2-c3-hc 1 1.150 0.000 1.000  
hc-c3-c3-hc 1 0.150 0.000 3.000  
hc-c3-c2-ha 1 0.000 0.000 2.000  
ha-c2-c2-ha 1 6.650 180.000 2.000  
hn-n-c3-h1 1 0.000 0.000 2.000  
hn-n-c3-ca 1 0.000 0.000 2.000  
c3-ca-ca-ca 1 3.625 180.000 2.000  
c3-ca-ca-ha 1 3.625 180.000 2.000  
h1-c3-ca-ca 1 0.000 0.000 2.000  
ca-ca-ca-ha 1 3.625 180.000 2.000  
ca-ca-ca-ca 1 3.625 180.000 2.000  
ca-ca-ca-os 1 3.625 180.000 2.000  
ca-ca-ca-oh 1 3.625 180.000 2.000  
ca-ca-oh-ho 1 0.900 180.000 2.000  
ha-ca-ca-ha 1 3.625 180.000 2.000  
ha-ca-ca-oh 1 3.625 180.000 2.000  
ca-ca-os-c3 1 0.900 180.000 2.000  
ha-ca-ca-os 1 3.625 180.000 2.000  
ca-os-c3-h1 1 0.383 0.000 3.000

IMPROPER

c-c3-n-hn 1.1 180.0 2.0  
c3-n-c-o 10.5 180.0 2.0 General  
improper torsional angle (2 general atom types)  
c2-c3-c2-ha 1.1 180.0 2.0 Using  
default value  
c3-ca-ca-ca 1.1 180.0 2.0  
ca-ca-ca-ha 1.1 180.0 2.0 General  
improper torsional angle (2 general atom types)  
ca-ca-ca-os 1.1 180.0 2.0 Using  
default value  
ca-ca-ca-oh 1.1 180.0 2.0 Using  
default value

NONBON

n 1.8240 0.1700  
c 1.9080 0.0860  
o 1.6612 0.2100  
c3 1.9080 0.1094  
c2 1.9080 0.0860  
hc 1.4870 0.0157  
ha 1.4590 0.0150  
hn 0.6000 0.0157  
h1 1.3870 0.0157  
ca 1.9080 0.0860  
os 1.6837 0.1700  
oh 1.7210 0.2104  
ho 0.0000 0.0000

Caps\_a.prepc

0 0 2

This is a remark line

molecule.res

MOL XYZ 0

CHANGE OMIT DU BEG

0.0000

1 DUMM DU M 999.000 999.0 -999.0

.00000

2 DUMM DU M 999.000 -999.0 999.0

.00000

3 DUMM DU M -999.000 999.0 999.0

.00000

4 N1 n M -3.094000 -0.325000 -

0.608000 -0.725022

5 C7 c B -3.782000 0.192000 0.423000

0.821321

6 O1 o E -4.404000 -0.472000 1.218000

-0.671813

|             |           |           |           |                 |           |           |   |
|-------------|-----------|-----------|-----------|-----------------|-----------|-----------|---|
| 7 C4 c3 3   | -3.820000 | 1.717000  | 0.533000  | 33 H14 hn E     | -2.495000 | 0.286000  | - |
| -0.396859   |           |           |           | 1.112000        | 0.408570  |           |   |
| 8 C2 c3 3   | -2.751000 | 2.536000  | -0.198000 | 34 C9 c3 M      | -2.730000 | -1.744000 | - |
| 0.120609    |           |           |           | 0.748000        | 0.194213  |           |   |
| 9 C1 c3 3   | -1.330000 | 2.385000  | 0.366000  | 35 H12 h1 E     | -3.218000 | -2.131000 | - |
| -0.006457   |           |           |           | 1.638000        | 0.038215  |           |   |
| 10 C3 c3 3  | -0.257000 | 2.889000  | -         | 36 H13 h1 E     | -3.150000 | -2.257000 |   |
| 0.611000    | -0.004386 |           |           | 0.104000        | 0.038215  |           |   |
| 11 C6 c2 B  | 1.138000  | 2.890000  | -         | 37 C10 ca M     | -1.238000 | -1.911000 | - |
| 0.036000    | -0.304240 |           |           | 0.840000        | -0.279649 |           |   |
| 12 C8 c2 B  | 2.031000  | 1.937000  | -         | 38 C14 ca B     | -0.556000 | -1.788000 | - |
| 0.237000    | -0.221025 |           |           | 2.036000        | -0.124435 |           |   |
| 13 C5 c3 3  | 3.428000  | 1.909000  | 0.335000  | 39 C16 ca S     | 0.829000  | -1.773000 | - |
| 0.347738    |           |           |           | 2.093000        | -0.477824 |           |   |
| 14 C11 c3 3 | 4.445000  | 1.638000  | -         | 40 H23 ha E     | 1.334000  | -1.672000 | - |
| 0.782000    | -0.396548 |           |           | 3.038000        | 0.145448  |           |   |
| 15 H15 hc E | 5.460000  | 1.652000  | -         | 41 H22 ha E     | -1.115000 | -1.690000 | - |
| 0.390000    | 0.095546  |           |           | 2.957000        | 0.128965  |           |   |
| 16 H16 hc E | 4.379000  | 2.388000  | -         | 42 C13 ca M     | -0.460000 | -2.051000 |   |
| 1.567000    | 0.095546  |           |           | 0.329000        | -0.242183 |           |   |
| 17 H17 hc E | 4.264000  | 0.660000  | -         | 43 H21 ha E     | -0.976000 | -2.158000 |   |
| 1.217000    | 0.095546  |           |           | 1.268000        | 0.169727  |           |   |
| 18 C12 c3 3 | 3.550000  | 0.840000  |           | 44 C15 ca M     | 0.906000  | -2.057000 |   |
| 1.430000    | -0.396548 |           |           | 0.295000        | 0.147461  |           |   |
| 19 H18 hc E | 3.354000  | -0.146000 |           | 45 O2 os S      | 1.691000  | -2.220000 |   |
| 1.028000    | 0.095546  |           |           | 1.404000        | -0.360027 |           |   |
| 20 H19 hc E | 4.554000  | 0.846000  |           | 46 C18 c3 3     | 1.091000  | -2.315000 |   |
| 1.852000    | 0.095546  |           |           | 2.646000        | 0.314502  |           |   |
| 21 H20 hc E | 2.847000  | 1.033000  |           | 47 H24 h1 E     | 1.888000  | -2.408000 |   |
| 2.237000    | 0.095546  |           |           | 3.372000        | -0.042984 |           |   |
| 22 H9 hc E  | 3.636000  | 2.885000  | 0.773000  | 48 H25 h1 E     | 0.444000  | -3.187000 |   |
| -0.052192   |           |           |           | 2.725000        | -0.042984 |           |   |
| 23 H11 ha E | 1.768000  | 1.088000  | -         | 49 H26 h1 E     | 0.502000  | -1.431000 |   |
| 0.850000    | 0.177728  |           |           | 2.885000        | -0.042984 |           |   |
| 24 H10 ha E | 1.392000  | 3.730000  |           | 50 C17 ca M     | 1.654000  | -1.874000 | - |
| 0.596000    | 0.130714  |           |           | 0.939000        | 0.545193  |           |   |
| 25 H5 hc E  | -0.277000 | 2.260000  | -         | 51 O3 o E       | 2.898000  | -1.807000 | - |
| 1.496000    | 0.025547  |           |           | 0.958000        | -0.753261 |           |   |
| 26 H6 hc E  | -0.516000 | 3.896000  | -         |                 |           |           |   |
| 0.939000    | 0.025547  |           |           |                 |           |           |   |
| 27 H1 hc E  | -1.263000 | 2.927000  |           | LOOP            |           |           |   |
| 1.307000    | 0.030681  |           |           | C17 C16         |           |           |   |
| 28 H2 hc E  | -1.115000 | 1.347000  |           |                 |           |           |   |
| 0.597000    | 0.030681  |           |           | IMPROPER        |           |           |   |
| 29 H3 hc E  | -2.759000 | 2.291000  | -         | C9 C7 N1 H14    |           |           |   |
| 1.258000    | -0.035956 |           |           | C4 N1 C7 O1     |           |           |   |
| 30 H4 hc E  | -3.037000 | 3.585000  | -         | C8 C3 C6 H10    |           |           |   |
| 0.150000    | -0.035956 |           |           | C6 C5 C8 H11    |           |           |   |
| 31 H7 hc E  | -4.808000 | 2.010000  |           | C9 C14 C10 C13  |           |           |   |
| 0.185000    | 0.099493  |           |           | C10 C16 C14 H22 |           |           |   |
| 32 H8 hc E  | -3.801000 | 1.933000  |           | C14 C17 C16 H23 |           |           |   |
| 1.596000    | 0.099493  |           |           | C10 C15 C13 H21 |           |           |   |
|             |           |           |           | C13 C17 C15 O2  |           |           |   |



C16 C15 C17 O3

DONE  
STOP

Caps\_a.frcmod

remark goes here

MASS

|    |        |       |
|----|--------|-------|
| n  | 14.010 | 0.530 |
| c  | 12.010 | 0.616 |
| o  | 16.000 | 0.434 |
| c3 | 12.010 | 0.878 |
| c2 | 12.010 | 0.360 |
| hc | 1.008  | 0.135 |
| ha | 1.008  | 0.135 |
| hn | 1.008  | 0.161 |
| h1 | 1.008  | 0.135 |
| ca | 12.010 | 0.360 |
| os | 16.000 | 0.465 |

BOND

|       |        |       |
|-------|--------|-------|
| n-c   | 427.60 | 1.379 |
| n-hn  | 403.20 | 1.013 |
| n-c3  | 328.70 | 1.462 |
| c-o   | 637.70 | 1.218 |
| c-c3  | 313.00 | 1.524 |
| c3-c3 | 300.90 | 1.538 |
| c3-hc | 330.60 | 1.097 |
| c3-c2 | 326.80 | 1.510 |
| c2-c2 | 569.40 | 1.334 |
| c2-ha | 343.10 | 1.088 |
| c3-h1 | 330.60 | 1.097 |
| c3-ca | 321.00 | 1.516 |
| ca-ca | 461.10 | 1.398 |
| ca-ha | 345.80 | 1.086 |
| ca-os | 376.60 | 1.370 |
| os-c3 | 308.60 | 1.432 |
| ca-o  | 598.10 | 1.236 |

ANGLE

|          |        |         |
|----------|--------|---------|
| n-c-o    | 74.220 | 123.050 |
| n-c-c3   | 66.790 | 115.180 |
| n-c3-h1  | 49.840 | 108.880 |
| n-c3-ca  | 66.210 | 112.380 |
| c-n-hn   | 48.330 | 117.550 |
| c-n-c3   | 63.390 | 120.690 |
| c-c3-c3  | 63.270 | 111.040 |
| c-c3-hc  | 46.930 | 108.770 |
| o-c-c3   | 67.400 | 123.200 |
| c3-c3-c3 | 62.860 | 111.510 |
| c3-c3-hc | 46.340 | 109.800 |
| c3-c3-c2 | 63.410 | 111.560 |

|          |        |         |
|----------|--------|---------|
| c3-c2-c2 | 64.060 | 123.630 |
| c3-c2-ha | 45.940 | 115.680 |
| c2-c3-hc | 46.990 | 110.360 |
| c2-c2-ha | 49.850 | 120.430 |
| hc-c3-hc | 39.400 | 107.580 |
| hn-n-c3  | 45.800 | 117.680 |
| c3-ca-ca | 63.530 | 120.770 |
| h1-c3-h1 | 39.240 | 108.460 |
| h1-c3-ca | 46.990 | 109.560 |
| ca-ca-ca | 66.620 | 120.020 |
| ca-ca-ha | 48.180 | 119.880 |
| ca-ca-o  | 71.370 | 123.260 |
| ca-ca-os | 69.580 | 119.200 |
| ca-os-c3 | 62.520 | 117.960 |
| os-c3-h1 | 50.800 | 109.780 |

DIHE

|             |   |       |         |        |
|-------------|---|-------|---------|--------|
| n-c-c3-c3   | 1 | 0.100 | 0.000   | -4.000 |
| n-c-c3-c3   | 1 | 0.070 | 0.000   | 2.000  |
| n-c-c3-hc   | 1 | 0.000 | 180.000 | 2.000  |
| n-c3-ca-ca  | 1 | 0.000 | 0.000   | 2.000  |
| c-n-c3-h1   | 1 | 0.000 | 0.000   | 2.000  |
| c-n-c3-ca   | 1 | 0.000 | 0.000   | 2.000  |
| c-c3-c3-c3  | 1 | 0.156 | 0.000   | 3.000  |
| c-c3-c3-hc  | 1 | 0.156 | 0.000   | 3.000  |
| o-c-n-hn    | 1 | 2.500 | 180.000 | -2.000 |
| o-c-n-hn    | 1 | 2.000 | 0.000   | 1.000  |
| o-c-n-c3    | 1 | 2.500 | 180.000 | 2.000  |
| o-c-c3-c3   | 1 | 0.000 | 180.000 | 2.000  |
| o-c-c3-hc   | 1 | 0.800 | 0.000   | -1.000 |
| o-c-c3-hc   | 1 | 0.000 | 0.000   | -2.000 |
| o-c-c3-hc   | 1 | 0.080 | 180.000 | 3.000  |
| c3-c-n-hn   | 1 | 2.500 | 180.000 | 2.000  |
| c3-c-n-c3   | 1 | 0.000 | 0.000   | -2.000 |
| c3-c-n-c3   | 1 | 1.500 | 180.000 | 1.000  |
| c3-c3-c3-c3 | 1 | 0.180 | 0.000   | -3.000 |
| c3-c3-c3-c3 | 1 | 0.250 | 180.000 | -2.000 |
| c3-c3-c3-c3 | 1 | 0.200 | 180.000 | 1.000  |
| c3-c3-c3-hc | 1 | 0.160 | 0.000   | 3.000  |
| c3-c3-c3-c2 | 1 | 0.156 | 0.000   | 3.000  |
| c3-c3-c2-c2 | 1 | 0.000 | 0.000   | 2.000  |
| c3-c3-c2-ha | 1 | 0.000 | 0.000   | 2.000  |
| c3-c2-c2-c3 | 1 | 6.650 | 180.000 | -2.000 |
| c3-c2-c2-c3 | 1 | 1.900 | 180.000 | 1.000  |
| c3-c2-c2-ha | 1 | 6.650 | 180.000 | 2.000  |
| c2-c3-c3-hc | 1 | 0.156 | 0.000   | 3.000  |
| c2-c2-c3-hc | 1 | 0.380 | 180.000 | -3.000 |
| c2-c2-c3-hc | 1 | 0.000 | 0.000   | -2.000 |
| c2-c2-c3-hc | 1 | 1.150 | 0.000   | 1.000  |
| hc-c3-c3-hc | 1 | 0.150 | 0.000   | 3.000  |
| hc-c3-c2-ha | 1 | 0.000 | 0.000   | 2.000  |
| ha-c2-c2-ha | 1 | 6.650 | 180.000 | 2.000  |
| hn-n-c3-h1  | 1 | 0.000 | 0.000   | 2.000  |

|             |   |       |         |       |
|-------------|---|-------|---------|-------|
| hn-n -c3-ca | 1 | 0.000 | 0.000   | 2.000 |
| c3-ca-ca-ca | 1 | 3.625 | 180.000 | 2.000 |
| c3-ca-ca-ha | 1 | 3.625 | 180.000 | 2.000 |
| h1-c3-ca-ca | 1 | 0.000 | 0.000   | 2.000 |
| ca-ca-ca-ha | 1 | 3.625 | 180.000 | 2.000 |
| ca-ca-ca-ca | 1 | 3.625 | 180.000 | 2.000 |
| ca-ca-ca-os | 1 | 3.625 | 180.000 | 2.000 |
| ca-ca-ca-o  | 1 | 3.625 | 180.000 | 2.000 |
| ha-ca-ca-ha | 1 | 3.625 | 180.000 | 2.000 |
| ha-ca-ca-o  | 1 | 3.625 | 180.000 | 2.000 |
| ca-ca-os-c3 | 1 | 0.900 | 180.000 | 2.000 |
| ha-ca-ca-os | 1 | 3.625 | 180.000 | 2.000 |
| ca-os-c3-h1 | 1 | 0.383 | 0.000   | 3.000 |
| os-ca-ca-o  | 1 | 3.625 | 180.000 | 2.000 |

IMPROPER

|                                                 |      |       |     |         |
|-------------------------------------------------|------|-------|-----|---------|
| c -c3-n -hn                                     | 1.1  | 180.0 | 2.0 |         |
| c3-n -c -o                                      | 10.5 | 180.0 | 2.0 | General |
| improper torsional angle (2 general atom types) |      |       |     |         |
| c2-c3-c2-ha                                     | 1.1  | 180.0 | 2.0 | Using   |
| default value                                   |      |       |     |         |

|                                                 |     |       |     |         |
|-------------------------------------------------|-----|-------|-----|---------|
| c3-ca-ca-ca                                     | 1.1 | 180.0 | 2.0 |         |
| ca-ca-ca-ha                                     | 1.1 | 180.0 | 2.0 | General |
| improper torsional angle (2 general atom types) |     |       |     |         |
| ca-ca-ca-os                                     | 1.1 | 180.0 | 2.0 | Using   |
| default value                                   |     |       |     |         |
| ca-ca-ca-o                                      | 1.1 | 180.0 | 2.0 | Using   |
| default value                                   |     |       |     |         |

NONBON

|    |        |        |
|----|--------|--------|
| n  | 1.8240 | 0.1700 |
| c  | 1.9080 | 0.0860 |
| o  | 1.6612 | 0.2100 |
| c3 | 1.9080 | 0.1094 |
| c2 | 1.9080 | 0.0860 |
| hc | 1.4870 | 0.0157 |
| ha | 1.4590 | 0.0150 |
| hn | 0.6000 | 0.0157 |
| h1 | 1.3870 | 0.0157 |
| ca | 1.9080 | 0.0860 |
| os | 1.6837 | 0.1700 |

**Table S2.** Molar fraction of Capsaicin (8-methyl-N-vanillyl-6-nonenamide, CAP, pKa=10.1) at different pH.

| <b>pH</b>  | <b>[H+]</b>     | <b>Neutral</b> | <b>Anion</b> |
|------------|-----------------|----------------|--------------|
| 0          | 1.00E+00        | 1.00E+00       | 7.94E-11     |
| 0.5        | 3.16E-01        | 1.00E+00       | 2.51E-10     |
| 1          | 1.00E-01        | 1.00E+00       | 7.94E-10     |
| 1.5        | 3.16E-02        | 1.00E+00       | 2.51E-09     |
| 2          | 1.00E-02        | 1.00E+00       | 7.94E-09     |
| 2.5        | 3.16E-03        | 1.00E+00       | 2.51E-08     |
| 3          | 1.00E-03        | 1.00E+00       | 7.94E-08     |
| 3.5        | 3.16E-04        | 1.00E+00       | 2.51E-07     |
| 4          | 1.00E-04        | 1.00E+00       | 7.94E-07     |
| 4.5        | 3.16E-05        | 1.00E+00       | 2.51E-06     |
| 5          | 1.00E-05        | 1.00E+00       | 7.94E-06     |
| 5.5        | 3.16E-06        | 1.00E+00       | 2.51E-05     |
| 6          | 1.00E-06        | 1.00E+00       | 7.94E-05     |
| 6.5        | 3.16E-07        | 1.00E+00       | 2.51E-04     |
| 7          | 1.00E-07        | 9.99E-01       | 7.94E-04     |
| <b>7.4</b> | <b>3.98E-08</b> | <b>0.998</b>   | <b>0.002</b> |
| 8          | 1.00E-08        | 9.97E-01       | 2.51E-03     |
| 8.5        | 3.16E-09        | 9.92E-01       | 7.88E-03     |
| 9          | 1.00E-09        | 9.75E-01       | 2.45E-02     |
| 9.5        | 3.16E-10        | 9.26E-01       | 7.36E-02     |
| 10         | 1.00E-10        | 7.99E-01       | 2.01E-01     |
| 10.5       | 3.16E-11        | 5.57E-01       | 4.43E-01     |
| 10.7       | 2.00E-11        | 2.85E-01       | 7.15E-01     |
| 11         | 1.00E-11        | 1.12E-01       | 8.88E-01     |
| 11.5       | 3.16E-12        | 3.83E-02       | 9.62E-01     |
| 12         | 1.00E-12        | 1.24E-02       | 9.88E-01     |
| 12.5       | 3.16E-13        | 3.97E-03       | 9.96E-01     |
| 13         | 1.00E-13        | 1.26E-03       | 9.99E-01     |
| 13.5       | 3.16E-14        | 3.98E-04       | 1.00E+00     |
| 14         | 1.00E-14        | 1.26E-04       | 1.00E+00     |

**Table S3.** Acronyms and structures of the modeled complexes. The chelation routes (CR) in which of them is involved is specified, as well as the chelation sites (CS)\_conformation (C) and structure.

| CR | CS_C    | Structure |
|----|---------|-----------|
| IA | O1a     |           |
| IA | O1a_ext |           |
| IA | O2a     |           |
| IA | O2a_ext |           |
| IA | O9      |           |
| IA | O9_ext  |           |

|             |             |  |
|-------------|-------------|--|
| IB          | O1a-O2a     |  |
| IB          | O1a-O2a_ext |  |
| IIA<br>IIIA | O1a         |  |
| IIA<br>IIIA | O1a_ext     |  |
| IIA         | O2a_ext     |  |

|      |             |  |
|------|-------------|--|
| IIA  | O9_ext      |  |
| IIB  | O1a-O2a     |  |
| IIIB |             |  |
| IIB  | O1a-O2a_ext |  |
| IIIB |             |  |
| IIIA | N8          |  |
| IIIA | N8_ext      |  |
| IIIB | N8-O9       |  |

|     |        |                                                                                                                                                                                                                                                                                                                                                                                                                                                                                                                                                                                                                                  |
|-----|--------|----------------------------------------------------------------------------------------------------------------------------------------------------------------------------------------------------------------------------------------------------------------------------------------------------------------------------------------------------------------------------------------------------------------------------------------------------------------------------------------------------------------------------------------------------------------------------------------------------------------------------------|
| IVA | N8     | 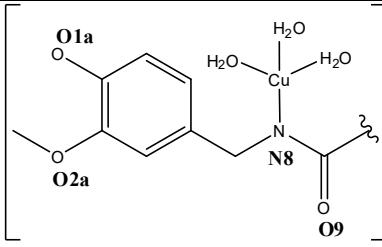 <p>The structure shows a copper atom (Cu) coordinated to two water molecules (H<sub>2</sub>O) and two other ligands. One ligand is a benzene ring with a methoxy group (-OCH<sub>3</sub>) at the 3-position and a hydroxyl group (-OH) at the 4-position. The oxygen atoms are labeled O1a and O2a. The other ligand is a carbonyl group (C=O) with a wavy line representing the rest of the molecule, labeled O9. A nitrogen atom (N8) is also coordinated to the copper atom and is bonded to the benzene ring and the carbonyl group.</p> |
| IVA | N8_ext |                                                                                                                                                                                                                                                                                                                                                                                                                                                                                                                                                                                                                                  |
| IVB | N8-O9  |  <p>The structure shows a copper atom (Cu) coordinated to two water molecules (H<sub>2</sub>O) and two other ligands. One ligand is a benzene ring with a methoxy group (-OCH<sub>3</sub>) at the 3-position and a hydroxyl group (-OH) at the 4-position. The oxygen atoms are labeled O1a and O2a. The other ligand is a carbonyl group (C=O) with a wavy line representing the rest of the molecule, labeled O9. A nitrogen atom (N8) is also coordinated to the copper atom and is bonded to the benzene ring and the carbonyl group.</p> |

**Table S4.** Gibbs free energies of reaction ( $\Delta G^\circ$ , kcal/mol), reorganization energies ( $\lambda$ , kcal/mol), Gibbs free energies of activation ( $\Delta G^\ddagger$ , kcal/mol), rate coefficients ( $k_i^{app}$ ,  $M^{-1}s^{-1}$ ) and overall rate coefficients ( $k_{overall}$ ,  $M^{-1}s^{-1}$ ) for the reduction of the free Cu(II) by reductants. The values corresponding to reduction by  $O_2^{\bullet-}$  and the ascorbate anion ( $Asc^-$ ) are included for comparison purposes. The data correspond to aqueous solution, at pH=7.4, and 298.15 K.

| Reductants                      | $\Delta G^\circ$ | $\lambda$ | $\Delta G^\ddagger$ | $k_i^{app}$ | $\frac{k_{O_2^{\bullet-}}^{app}}{k_i^{app}}$ | $\frac{k_{Asc^-}^{app}}{k_i^{app}}$ |
|---------------------------------|------------------|-----------|---------------------|-------------|----------------------------------------------|-------------------------------------|
| $O_2^{\bullet-}$                | -24.01           | 51.87     | 3.74                | 4.46E+09    |                                              |                                     |
| $Asc^-$                         | -4.67            | 34.14     | 6.36                | 1.33E+08    |                                              |                                     |
| capN                            | 5.07             | 32.01     | 10.74               | 7.39E+04    | 60342.80                                     | 1798.15                             |
| capN_ext                        | 5.02             | 33.41     | 11.05               | 5.38E+03    | 829869.92                                    | 24729.16                            |
| capAn                           | -21.01           | 31.00     | 0.80                | 1.05E+07    | 424.49                                       | 12.65                               |
| capAn_ext                       | -20.21           | 31.28     | 0.98                | 4.96E+06    | 900.06                                       | 26.82                               |
| <b><math>k_{overall}</math></b> |                  |           |                     | 1.55E+07    | 286.98                                       | 8.55                                |
